# Supplementary material for: Effect of SGLT2 Inhibitors on Cardiac Structure and Function Assessed by Cardiac Magnetic Resonance: A Systematic Review and Meta-Analysis
Source: Research Square preprint supplement (doi:10.21203/rs.3.rs-6790667/v1), 2025-06-09
Supplement: Supplementary file 2 [file 3ba56683fa02cee3369a9642.docx]

# Supplementary Table 3. Leave-one-out-analysis for main CMR parameters.

| **Excluded Study** | **Effect Estimate** | **p-value** | **I² (%)** |
| --- | --- | --- | --- |
| **LVEDV** | | | |
| Brown et al | -7.96 | 0.023 | 70.48 |
| Cohen et al | -5.77 | 0.064 | 61.12 |
| Connelly et al | -7.85 | 0.025 | 71.47 |
| Hsu et al | -8.23 | 0.017 | 67.85 |
| Hundertmark et al | -7.43 | 0.046 | 75.54 |
| Lee et al | -6.17 | 0.051 | 68.84 |
| Santos-Gallego et al | -5.38 | 0.043 | 59.48 |
| Singh et al | -7.59 | 0.020 | 71.69 |
| Thirunavukarasu et al | -6.60 | 0.043 | 71.41 |
| Verma et al | -7.93 | 0.022 | 71.28 |
| **LVESV** | | | |
| Brown et al | -7.56 | 0.103 | 82.61 |
| Connelly et al | -7.03 | 0.127 | 83.68 |
| Hsu et al | -7.60 | 0.088 | 82.20 |
| Lee et al | -5.21 | 0.204 | 81.83 |
| Singh et al | -6.39 | 0.122 | 83.53 |
| Santos-Gallego et al | -2.42 | 0.195 | 46.54 |
| Thirunavukarasu et al | -5.1 | 0.188 | 81.72 |
| Verma et al | -6.97 | 0.124 | 83.70 |
| **LVEDVi** | | | |
| Carberry et al | -0.64 | 0.640 | 51.59 |
| Connelly et al | -0.38 | 0.793 | 51.24 |
| Hassan et al | -0.53 | 0.718 | 52.14 |
| Hsu et al | -1.15 | 0.333 | 33.04 |
| Lee et al | 0.07 | 0.935 | 10.02 |
| Oldgren et al | -0.72 | 0.613 | 50.71 |
| Satoh et al | -0.82 | 0.512 | 46.28 |
| Singh et al | -0.64 | 0.623 | 50.78 |
| Thirunavukarasu et al | -0.22 | 0.853 | 45.58 |
| **LVESVi** | | | |
| Carberry et al | -1.23 | 0.211 | 46.47 |
| Connelly et al | -1.15 | 0.295 | 41.81 |
| Hassan et al | -0.98 | 0.259 | 41.93 |
| Hsu et al | -1.53 | 0.067 | 17.67 |
| Lee et al | -0.63 | 0.363 | 23.05 |
| Oldgren et al | -1.37 | 0.218 | 46.75 |
| Satoh et al | -1.17 | 0.220 | 46.26 |
| Singh et al | -1.18 | 0.212 | 45.91 |
| Thirunavukarasu et al | -0.78 | 0.277 | 28.78 |
| Verma et al | -1.18 | 0.273 | 46.54 |
| **LVM** | | | |
| Brown et al | -4.98 | 0.037 | 58.60 |
| Cohen et al | -5.02 | 0.027 | 55.64 |
| Connelly et al | -5.03 | 0.024 | 54.56 |
| Gaborit et al | -4.34 | 0.038 | 58.80 |
| Hundertmark et al | -3.98 | 0.065 | 57.38 |
| Lee et al | -4.43 | 0.044 | 58.67 |
| Santos-Gallego et al | -2.73 | 0.006 | 0.00 |
| Verma et al | -4.25 | 0.051 | 57.71 |
| **LVMi** | | | |
| Brown et al | -1.12 | 0.105 | 45.22 |
| Carberry et al | -0.99 | 0.131 | 46.33 |
| Connelly et al | -1.01 | 0.127 | 46.30 |
| Gaborit et al | -0.96 | 0.110 | 44.48 |
| Hsu et al | -0.75 | 0.196 | 41.76 |
| Hundertmark et al | -0.61 | 0.270 | 38.14 |
| Lee et al | -0.77 | 0.576 | 42.97 |
| Oldgren et al | -1.16 | 0.063 | 33.44 |
| Singh et al | -0.94 | 0.109 | 43.42 |
| Thirunavukarasu et al | -0.65 | 0.213 | 34.62 |
| Verma et al | -0.54 | 0.295 | 30.28 |
| **LVEF** | | | |
| Brown et al | 1.18 | 0.149 | 82.13 |
| Carberry et al | 1.23 | 0.131 | 82.02 |
| Cohen et al | 1.55 | 0.029 | 72.79 |
| Connelly et al | 1.08 | 0.182 | 81.94 |
| Gaborit et al | 1.25 | 0.123 | 81.96 |
| Hassan et al | 1.00 | 0.201 | 81.77 |
| Hsu et al | 1.39 | 0.077 | 79.85 |
| Hundertmark et al | 1.08 | 0.210 | 84.46 |
| Lee et al | 1.22 | 0.136 | 82.00 |
| Oldgren et al | 1.22 | 0.138 | 82.00 |
| Singh et al | 1.17 | 0.148 | 82.14 |
| Santos-Gallego et al | 0.59 | 0.364 | 64.60 |
| Thirunavukarasu et al | 0.87 | 0.218 | 80.75 |
| Verma et al | 1.07 | 0.187 | 81.92 |
| **LVSV** | | | |
| Brown et al | 1.88 | 0.014 | 0.00 |
| Hundertmark et al | 1.47 | 0.218 | 0.00 |
| Singh et al | 0.94 | 0.336 | 0.00 |
| Thirunavukarasu et al | 1.16 | 0.131 | 0.00 |
| **LAVi** | | | |
| Carberry et al | -1.36 | 0.209 | 12.88 |
| Lee et al | -0.33 | 0.730 | 53.93 |
| Oldgren et al | 0.72 | 0.161 | 7.88 |
| Pourafkari et al | -1.31 | 0.211 | 63.32 |
| Singh et al | -0.52 | 0.594 | 60.30 |
| Thirunavukarasu et al | -0.49 | 0.620 | 59.07 |

**Legend.** LVEDV: Left ventricular end-diastolic volume; LVESV: Left ventricular end-systolic volume; LVEDVi: Left ventricular end-diastolic volume indexed; LVESVi: Left ventricular end-systolic volume indexed; LVM: Left ventricular mass; LVMi: Left ventricular mass indexed; LVEF: Left ventricular ejection fraction; LVSV: Left ventricular stroke volume; LAVi: left atrial volume indexed.
