# Supplementary material for: Effect of SGLT2 Inhibitors on Cardiac Structure and Function Assessed by Cardiac Magnetic Resonance: A Systematic Review and Meta-Analysis
Source: Research Square preprint supplement (doi:10.21203/rs.3.rs-6790667/v1), 2025-06-09
Supplement: Supplementary file 3 [file 42dc70ec137416bba621d043.docx]

**Supplementary Table 4. Grading of evidence for the association of CMR parameters in patients treated with SGLT2i.**

| **Certainty assessment** | | | | | | | **Certainty** |
| --- | --- | --- | --- | --- | --- | --- | --- |
| **Number of studies** | **Study design** | **Risk of bias** | **Inconsistency** | **Indirectness** | **Imprecision** | **Other considerations** |
| **LVEDV** | | | | | | | |
| 10 | RCTs and  single-center prospective studies | Some concern | Some concern | No | Some concern | No pubblication bias | 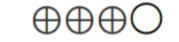  Moderate |
| **LVESV** | | | | | | | |
| 8 | RCTs and  single-center prospective studies | Some concern | Some concern | No | Some concern | No pubblication bias | 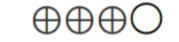  Moderate |
| **LVEDVi** | | | | | | | |
| 10 | RCTs and  single-center prospective studies | Some concern | Some concern | No | Some concern | No pubblication bias | 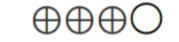  Moderate |
| **LVESVi** | | | | | | | |
| 9 | RCTs and  single-center prospective studies | Some concern | Some concern | No | Some concern | No pubblication bias | 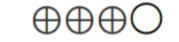  Moderate |
| **LVM** | | | | | | | |
| 9 | RCTs and  single-center prospective studies | Some concern | Some concern | No | Some concern | No pubblication bias | 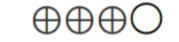  Moderate |
| **LVMi** | | | | | | | |
| 11 | RCTs and  single-center prospective studies | Some concern | Some concern | No | Some concern | No pubblication bias | 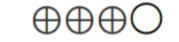  Moderate |
| **LVEF** | | | | | | | |
| 14 | RCTs and  single-center prospective studies | Some concern | Some concern | No | Some concern | No pubblication bias | 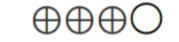  Moderate |
| **LVSV** | | | | | | | |
| 4 | RCTs and  single-center prospective studies | Some concern | Some concern | No | Some concern | No pubblication bias | 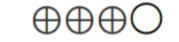  Moderate |
| **GLS** | | | | | | | |
| 5 | RCTs and  single-center prospective studies | Some concern | Some concern | No | Some concern | No pubblication bias | 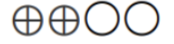  Low |
| **LAVi** | | | | | | | |
| 6 | RCTs and  single-center prospective studies | Some concern | Some concern | No | Some concern | Possible  publication bias | 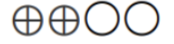  Low |
| **T1** | | | | | | | |
| 3 | RCT and  single-center prospective studies | Some concern | Serious concern | Serious concern | Some concern | Possible  publication bias | 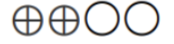  Low |
| **ECV** | | | | | | | |
| 6 | RCTs and  single-center prospective studies | Some concern | Some concern | No | Some concern | No pubblication bias | 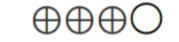  Moderate |
| **RVEDVi** | | | | | | | |
| 4 | single-center prospective studies | Some concern | Serious concern | Serious concern | Some concern | Possible  publication bias | 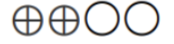  Low |
| **RVESVi** | | | | | | | |
| 4 | single-center prospective studies | Some concern | Serious concern | Serious concern | Some concern | Possible  publication bias | 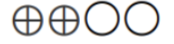  Low |
| **RVEF** | | | | | | | |
| 3 | single-center prospective studies | Some concern | Serious concern | Serious concern | Some concern | Possible  publication bias | 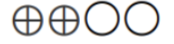  Low |
| **Pericardial fat** | | | | | | | |
| 3 | single-center prospective studies | Some concern | Serious concern | Serious concern | Some concern | Possible  publication bias | 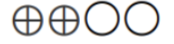  Low |

**Legend.** LVEDV: left ventricular end-diastolic volume, LVESV: left ventricular end-systolic volume, LVEDVi: left ventricular end- diastolic volume indexed, LVESVi: left ventricular end-systolic volume indexed, LVM: left ventricular mass;LVMi: left ventricular mass indexed, LVSV: left ventricular stroke volume; GLS: global longitudinal strain; LVEF: left ventricular ejection fraction, LAVi: left atrial volume indexed, ECV: extracellular volume, RVEDVi: right ventricular end- diastolic volume indexed, RVESVi: right ventricular end- systolic volume indexed.
