# Supplementary material for: Effect of SGLT2 Inhibitors on Cardiac Structure and Function Assessed by Cardiac Magnetic Resonance: A Systematic Review and Meta-Analysis
Source: Research Square preprint supplement (doi:10.21203/rs.3.rs-6790667/v1), 2025-06-09
Supplement: Supplementary file 4 [file e10a4a65cb80c7bcd9bf8a26.docx]

**Supplementary Table 2. The Newcastle-Ottawa Scale (NOS) for assessing the quality of studies in meta-analyses**

| **Studies and year** | **Selection** | | | | | **Comparability** | **Outcomes** | | | | **Total** | |
| --- | --- | --- | --- | --- | --- | --- | --- | --- | --- | --- | --- | --- |
|  | Representativeness of the exposed cohort | Selection of the non exposed cohort | Ascertainment of exposure | Demonstration that outcome of interest was not present at start of study | Study controls for cardiac reverse remodeling | | Assessment of outcome | Was follow-up long enough for outcomes to occur | Adequacy of follow up of cohorts | Maximum 9 | |
| Bouchi et al 2017 | 1 |  | 1 | 1 |  | | 1 |  | 1 | 5 | |
| Brown et al 2020 | 1 | 1 | 1 | 1 | 2 | | 1 | 1 | 1 | 9 | |
| Carberry et al 2025 | 1 | 1 | 1 | 1 | 2 | | 1 | 1 | 1 | 9 | |
| Cohen et al 2019 | 1 | 1 | 1 | 1 | 1 | | 1 | 1 | 1 | 8 | |
| Connelly et al  2023 | 1 | 1 | 1 | 1 | 2 | | 1 | 1 | 1 | 9 | |
| Dihoum et al 2024 | 1 | 1 | 1 | 1 | 2 | | 1 | 1 | 1 | 9 | |
| Fukuda et al 2017 | 1 |  | 1 | 1 |  | | 1 |  | 1 | 5 | |
| Gaborit et al 2021 | 1 | 1 | 1 | 1 | 2 | | 1 |  | 1 | 8 | |
| Hassan et al 2024 | 1 |  | 1 | 1 |  | | 1 | 1 | 1 | 6 | |
| Hsu et al 2019 | 1 |  | 1 | 1 |  | | 1 | 1 | 1 | 6 | |
| Hundertmark et al 2023 | 1 | 1 | 1 | 1 | 2 | | 1 |  | 1 | 8 | |
| Lee et al  2021 | 1 | 1 | 1 | 1 | 2 | | 1 | 1 | 1 | 9 | |
| Pourafkari et al 2024 | 1 | 1 | 1 | 1 | 2 | | 1 | 1 | 1 | 9 | |
| Oldgren et al  2021 | 1 | 1 | 1 | 1 | 2 | | 1 |  | 1 | 8 | |
| Santos-Gallego et al  2021 | 1 | 1 | 1 | 1 | 2 | | 1 | 1 | 1 | 9 | |
| Sarak et al 2021 | 1 | 1 | 1 | 1 | 2 | | 1 | 1 | 1 | 9 | |
| Satoh et al 2024 | 1 |  | 1 | 1 |  | | 1 | 1 | 1 | 6 | |
| Singh et al 2020 | 1 | 1 | 1 | 1 | 2 | | 1 | 1 | 1 | 9 | |
| Thirunavukarasu et al 2021 | 1 |  | 1 | 1 | 1 | | 1 |  |  | 5 | |
| Verma et al 2019 | 1 | 1 | 1 | 1 | 2 | | 1 | 1 | 1 | 9 | |
| Wang et al 2024 | 1 | 1 | 1 | 1 | 2 | | 1 | 1 | 1 | 9 | |
